# Supplementary material
Source: PubMed Central journal article supplement (PMC3487125)
Supplement: mmc1.pdf [file mmc1.pdf]

## **Supplemental Data**

### **In-Frame Mutations in Exon 1 of *SKI***

#### **Cause Dominant Shprintzen-Goldberg Syndrome**

Virginie Carmignac, Julien Thevenon, Lesley Adès, Bert Callewaert, Sophie Julia, Christel Thauvin-Robinet, Lucie Gueneau, Jean-Benoit Courcet, Estelle Lopez, Katherine Holman, Marjolijn Renard, Henri Plauchu, Ghislaine Plessis, Julie De Backer, Anne Child, Gavin Arno, Laurence Duplomb, Patrick Callier, Bernard Aral, Pierre Vabres, Nadège Gigot, Eloisa Arbustini, Maurizia Grasso, Peter N. Robinson, Cyril Goizet, Clarisse Baumann, Maja Di Rocco, Jaime Sanchez Del Pozo, Frédéric Huet, Guillaume Jondeau, Gwenaëlle Collod-Beroud, Christophe Beroud, Jeanne Amiel, Valérie Cormier-Daire, Jean-Baptiste Rivière, Catherine Boileau, Anne De Paepe, and Laurence Faivre

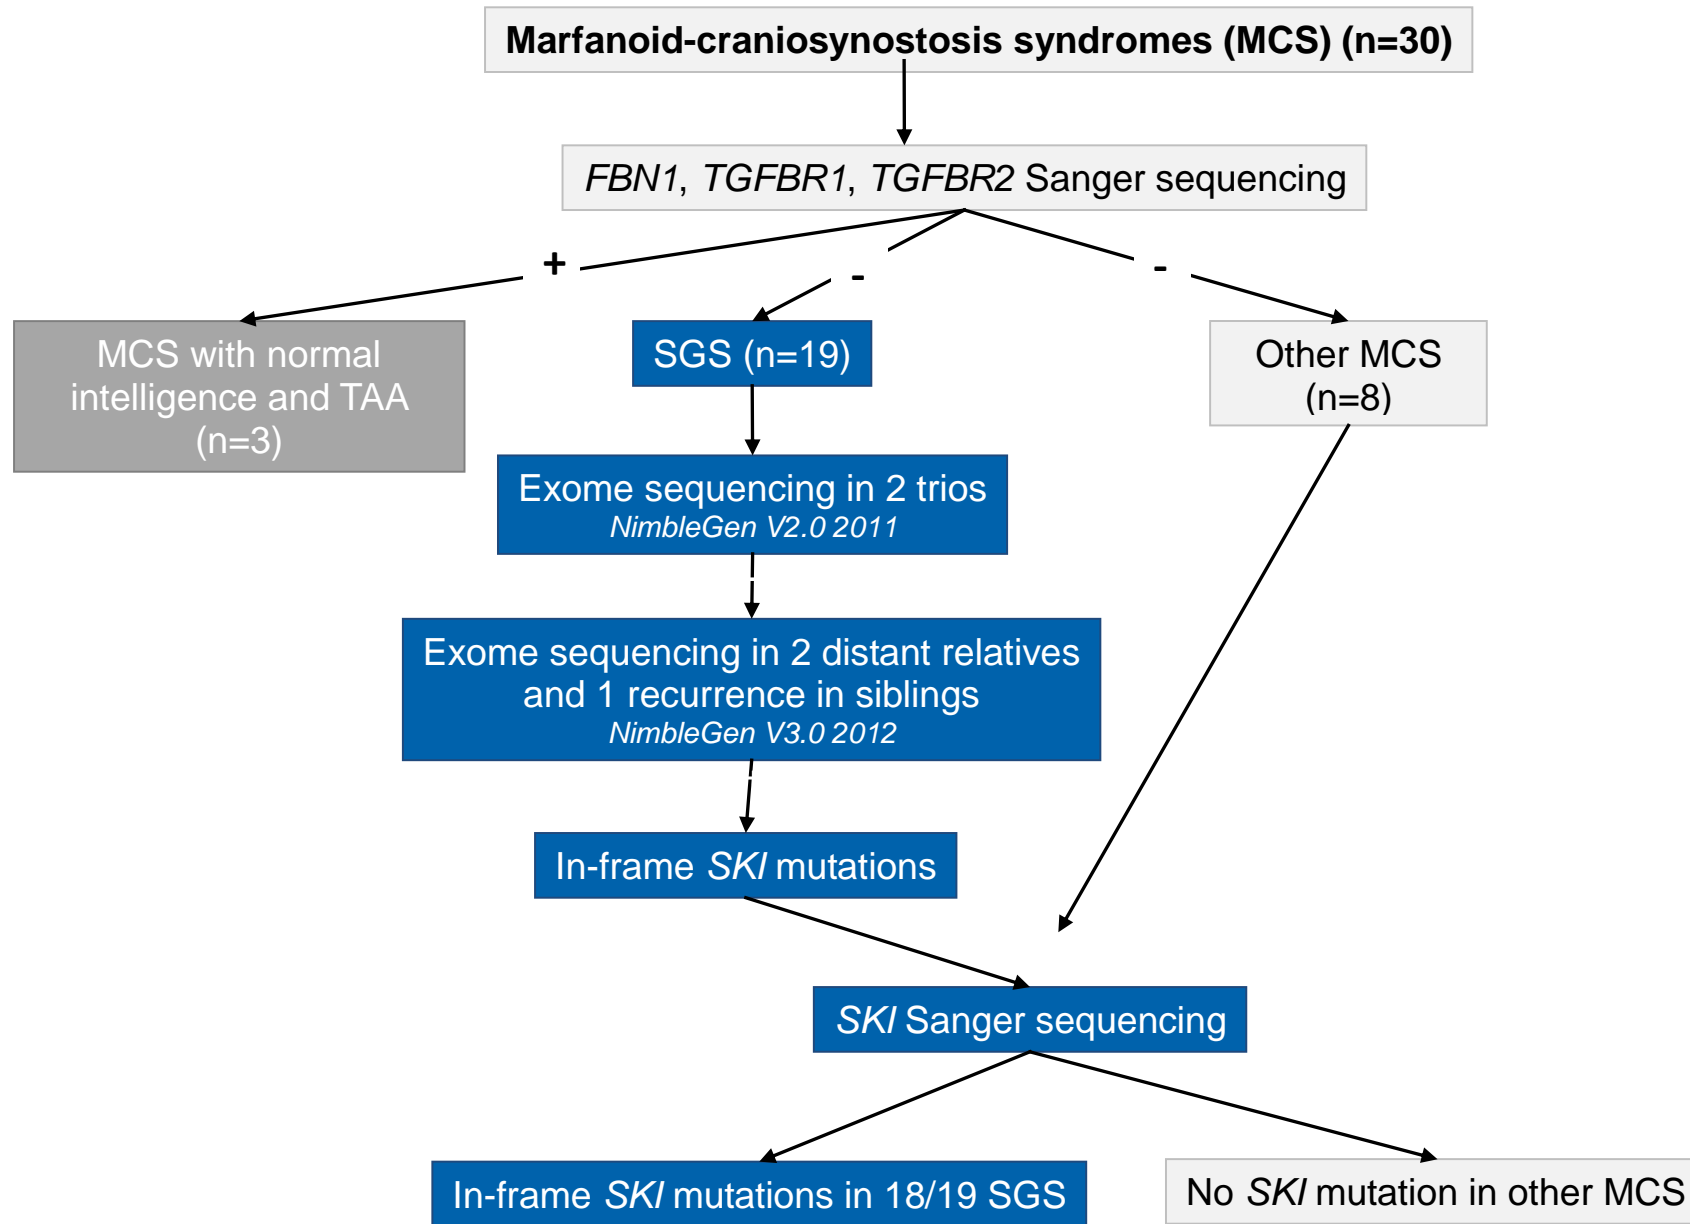

Figure S1. Design of the Study

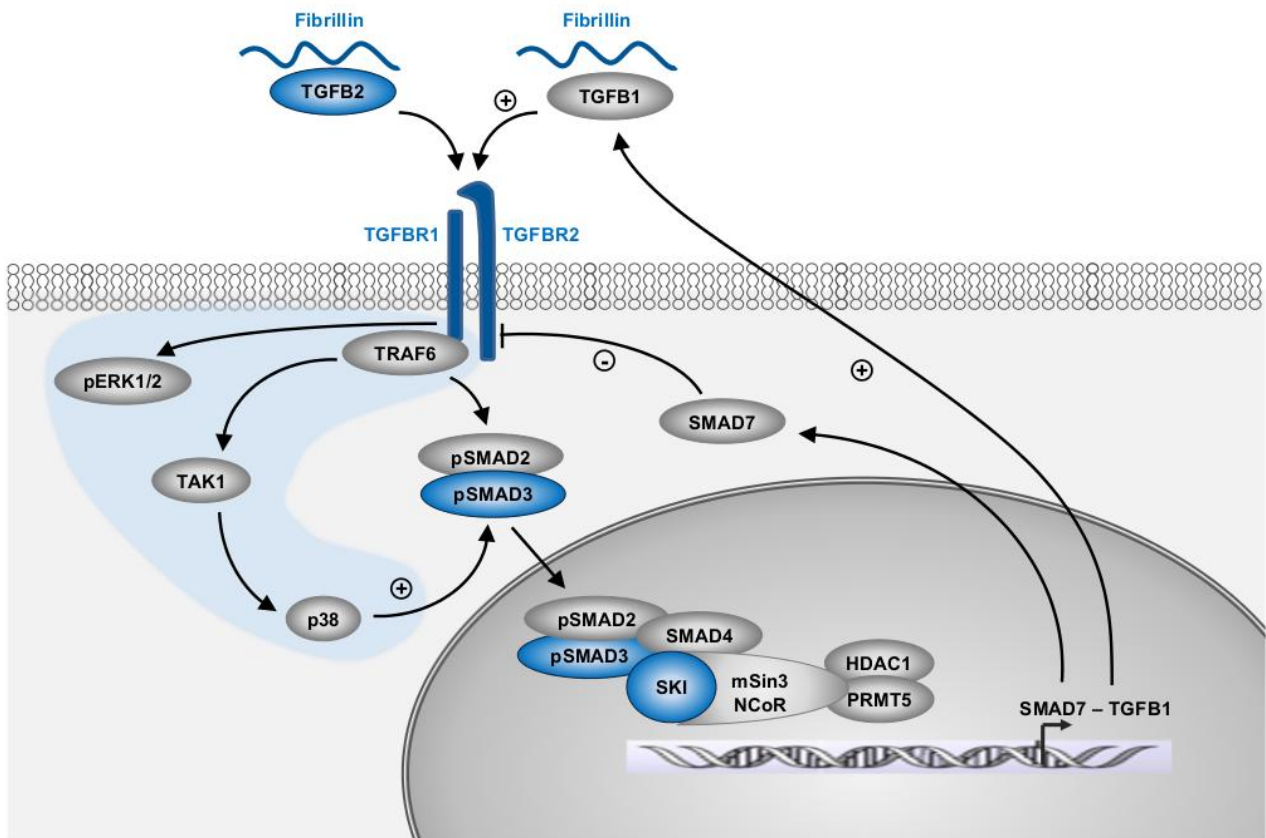

**Figure S2. SKI within the TGF-β Pathway (adapted from Holm et al., 2011<sup>19</sup>)**

This diagram highlights the genes implicated in marfanoid syndromes (in blue).

**Table S1. Detailed Clinical Features of Non-SGS Marfanoid-Craniosynostosis Patients**

| Family                          | F14                         | F15                          | F16                          | F17      | F18      | F19      | F20      | F21      | F22      | F23      | F24      | Total        |
|---------------------------------|-----------------------------|------------------------------|------------------------------|----------|----------|----------|----------|----------|----------|----------|----------|--------------|
| Affected Individual             | 20                          | 21                           | 22                           | 23       | 24       | 25       | 26       | 27       | 28       | 29       | 30       |              |
| Sex                             | M                           | M                            | F                            | F        | F        | M        | M        | F        | M        | M        | F        | 6M/5F        |
| Age (years)                     | 15                          | 6                            | 8                            | 22       | 22       | 13       | 23       | 20       | 19       | 1        | 21       |              |
| <b>Craniosynostosis</b>         | +                           | +                            | +                            | +        | +        | +        | +        | +        | +        | +        | +        | <b>11/11</b> |
| Arachnodactyly                  | +                           | +                            | +                            | +        | +        | +        | +        | +        | +        | +        | +        | 11/11        |
| Pectus deformity                | +                           | -                            | +                            | +        | -        | +        | -        | +        | -        | -        | +        | 6/11         |
| Scoliosis                       | +                           | +                            | +                            | +        | +        | +        | -        | -        | -        | -        | +        | 7/11         |
| Joint contractures              | -                           | -                            | -                            | +        | -        | +        | -        | -        | +        | -        | -        | 3/11         |
| Camptodactyly                   | -                           | -                            | -                            | -        | +        | +        | -        | -        | -        | -        | +        | 3/11         |
| Foot malposition                | +                           | +                            | +                            | +        | +        | +        | +        | -        | NA       | -        | +        | 8/10         |
| Scapho/dolichocephaly           | +                           | +                            | +                            | +        | -        | +        | +        | NA       | -        | +        | +        | 8/10         |
| Hypertelorism                   | -                           | +                            | +                            | -        | -        | -        | -        | +        | +        | -        | +        | 5/11         |
| Proptosis                       | -                           | -                            | -                            | +        | +        | -        | -        | +        | +        | +        | +        | 6/11         |
| Downslanting palpebral fissures | -                           | +                            | +                            | -        | -        | +        | -        | NA       | NA       | -        | -        | 3/9          |
| Micro/retrognathia              | -                           | -                            | -                            | -        | -        | -        | -        | NA       | -        | +        | +        | 2/10         |
| Intellectual disability         | -                           | -                            | -                            | -        | -        | +        | +        | NA       | +        | +        | -        | 4/10         |
| Hernias                         | +                           | +                            | +                            | +        | +        | -        | -        | NA       | -        | +        | -        | 6/10         |
| Loss of subcutaneous fat        | -                           | -                            | -                            | -        | -        | -        | -        | NA       | -        | -        | -        | 0/10         |
| Valvular anomalies              | +                           | +                            | +                            | +        | -        | -        | +        | NA       | -        | NA       | +        | 6/9          |
| Aortic root dilatation          | + <sup>a</sup>              | + <sup>a</sup>               | + <sup>a</sup>               | +        | -        | +        | -        | NA       | -        | NA       | +        | 6/9          |
| Myopia                          | -                           | +                            | -                            | -        | NA       | NA       | -        | NA       | -        | NA       | -        | 1/7          |
| SKI mutation                    | -                           | -                            | -                            | -        | -        | -        | -        | -        | -        | -        | -        | 0/11         |
| Other mutations                 | <i>FBN1</i><br>p.Cys1254Tyr | <i>TGFBR1</i><br>p.Glu245Gly | <i>TGFBR2</i><br>p.Arg528His | -        | -        | -        | -        | -        | -        | -        | -        | 3/11         |
| Inheritance                     | <i>de novo</i>              | <i>de novo</i>               | <i>de novo</i>               | Sporadic |              |

F : Female ; M : Male ; NA : Not available.

<sup>a</sup> Aortic dilatation required surgery in childhood

**Table S2. Next-Generation-Sequencing Statistics**

|                                      | Project 1 (2011)               |             |             |             |             |             | Project 2 (2012)   |             |             |             |             |  |
|--------------------------------------|--------------------------------|-------------|-------------|-------------|-------------|-------------|--------------------|-------------|-------------|-------------|-------------|--|
| Family                               | F1                             | F1          | F1          | F2          | F2          | F2          | F4                 | F4          | F3          | F3          | F3          |  |
| Individual                           | II-1                           | I-1         | I-2         | II-1        | I-1         | I-2         | IV-2               | III-1       | II-4        | I-1         | I-2         |  |
| NB_READS                             | 152 949 574                    | 188 373 140 | 153 270 902 | 164 636 014 | 172 788 840 | 188 524 030 | 140 793 700        | 123 309 166 | 124 054 811 | 110 402 922 | 120 007 422 |  |
| PERCENT_MAPPED_READS                 | 88,34%                         | 88,62%      | 91,31%      | 90,08%      | 90,54%      | 88,29%      | 98,38              | 98,26       | 97,87       | 97,77       | 97,97       |  |
| PERCENT_PAIRING                      | 98,54%                         | 98,95%      | 98,83%      | 98,82%      | 98,77%      | 98,93%      | 99,63              | 99,62       | 99,49       | 99,43       | 99,49       |  |
| PERCENT_DUPLICATE_READS              | 7,11%                          | 7,58%       | 8,44%       | 6,20%       | 6,99%       | 6,04%       | 12,76              | 10,94       | 12,77       | 14,13       | 13,36       |  |
| Capture kit                          | Nimblegen SeqCap EZ Exome v2.0 |             |             |             |             |             | Nimblegen exome V3 |             |             |             |             |  |
| PERCENT_NT_30X                       | 88%                            | 90%         | 88%         | 90%         | 90%         | 91%         | 88,32              | 87,77       | 86,22       | 84,87       | 86,16       |  |
| PERCENT_REGIONS_0x                   | 1%                             | 1%          | 1%          | 1%          | 1%          | 1%          | 0,69               | 0,72        | 0,81        | 0,60        | 0,82        |  |
| PERCENT_REGIONS_FULL_COVER           | 98%                            | 98%         | 98%         | 97%%        | 98%         | 98%         | 97,30              | 97,23       | 96,94       | 97,04       | 96,91       |  |
| MEAN_COVER                           | 177,65                         | 220,17      | 173,83      | 195,78      | 206,05      | 229,30      | 140,79             | 130,14      | 125,12      | 110,29      | 122,25      |  |
| MEDIAN_COVER                         | 142,00                         | 177,00      | 139,00      | 158,00      | 179,00      | 187,00      | 111,00             | 103,00      | 99,00       | 87,00       | 97,00       |  |
| Exonic heterozygous call             | 12 851                         | 12 765      | 12 619      | 12 732      | 12 811      | 12 872      | 14 694             | 14 585      | 13 973      | 14 356      | 14 528      |  |
| De novo Trio analysis                | 84                             |             |             | 51          |             |             | na                 |             | 71          |             |             |  |
| Intrafamilial call segregation study | na                             |             |             | na          |             |             | 12 067             |             | na          |             |             |  |
| Absent from local Exome database     | 50                             |             |             | 30          |             |             | 314                |             | 31          |             |             |  |
| EVS6500 <1/1000 variant filter       | 32                             |             |             | 18          |             |             | 46                 |             | 24          |             |             |  |
| TGF-beta pathway filter              | 0                              |             |             | 0           |             |             | 1                  |             | 0           |             |             |  |

na : not appropriate.

**Table S3. Strategy for Application of a Biological Filter (Cellular TGF- $\beta$  Pathway)**

| HGNC Gene Symbol | OMIM number | OMIM reference                                                  |
|------------------|-------------|-----------------------------------------------------------------|
| <i>E2F4</i>      | 600659      | E2F TRANSCRIPTION FACTOR 4                                      |
| <i>E2F5</i>      | 600967      | E2F TRANSCRIPTION FACTOR 5                                      |
| <i>FKBP1A</i>    | 186945      | FK506-BINDING PROTEIN 1A                                        |
| <i>FOXH1</i>     | 603621      | FORKHEAD BOX H1                                                 |
| <i>FOXO3</i>     | 602681      | FORKHEAD BOX O3A                                                |
| <i>HDAC1</i>     | 601241      | HISTONE DEACETYLASE 1                                           |
| <i>MEN1</i>      | 131100      | MULTIPLE ENDOCRINE NEOPLASIA, TYPE I                            |
| <i>MTMR4</i>     | 603559      | MYOTUBULARIN-RELATED PROTEIN 4                                  |
| <i>NEDD4L</i>    | 606384      | UBIQUITIN PROTEIN LIGASE NEDD4-LIKE                             |
| <i>NR1I2</i>     | 603065      | NUCLEAR RECEPTOR SUBFAMILY 1, GROUP I, MEMBER 2                 |
| <i>PARD6A</i>    | 607484      | PARTITIONING-DEFECTIVE PROTEIN 6, C. ELEGANS, HOMOLOG OF, ALPHA |
| <i>PARP1</i>     | 173870      | POLY (ADP-RIBOSE) POLYMERASE 1                                  |
| <i>PMEPA1</i>    | 606564      | TRANSMEMBRANE PROSTATE ANDROGEN-INDUCED RNA                     |
| <i>PPA1</i>      | 179030      | PYROPHOSPHATASE, INORGANIC, 1                                   |
| <i>PPM1A</i>     | 606108      | PROTEIN PHOSPHATASE, MAGNESIUM-DEPENDENT, 1A                    |
| <i>PPP1R15A</i>  | 611048      | PROTEIN PHOSPHATASE 1, REGULATORY SUBUNIT 15A                   |
| <i>RBL1</i>      | 116957      | RETINOBLASTOMA-LIKE 1                                           |
| <i>RHOA</i>      | 165390      | RAS HOMOLOG GENE FAMILY, MEMBER A                               |
| <i>RNF11</i>     | 612598      | RING FINGER PROTEIN 11                                          |
| <i>RNF111</i>    | 605840      | RING FINGER PROTEIN 111                                         |
| <i>SKI</i>       | 164780      | V-SKI AVIAN SARCOMA VIRAL ONCOGENE HOMOLOG                      |
| <i>SKIL</i>      | 165340      | SKI-LIKE                                                        |
| <i>SMAD2</i>     | 601366      | MOTHERS AGAINST DECAPENTAPLEGIC, DROSOPHILA, HOMOLOG OF, 2      |
| <i>SMAD3</i>     | 603109      | MOTHERS AGAINST DECAPENTAPLEGIC, DROSOPHILA, HOMOLOG OF, 3      |
| <i>SMAD4</i>     | 600993      | MOTHERS AGAINST DECAPENTAPLEGIC, DROSOPHILA, HOMOLOG OF, 4      |
| <i>SMAD7</i>     | 602932      | MOTHERS AGAINST DECAPENTAPLEGIC, DROSOPHILA, HOMOLOG OF, 7      |
| <i>SMURF1</i>    | 605568      | SMAD-SPECIFIC E3 UBIQUITIN PROTEIN LIGASE 1                     |
| <i>SMURF2</i>    | 605532      | SMAD-SPECIFIC E3 UBIQUITIN PROTEIN LIGASE 2                     |
| <i>SP1</i>       | 189906      | TRANSCRIPTION FACTOR Sp1                                        |
| <i>STRAP</i>     | 605986      | SERINE/THREONINE KINASE RECEPTOR-ASSOCIATED PROTEIN             |
| <i>STUB1</i>     | 607207      | STIP1 HOMOLOGOUS AND U BOX-CONTAINING PROTEIN 1                 |
| <i>TFDP1</i>     | 189902      | TRANSCRIPTION FACTOR DP1                                        |
| <i>TFDP2</i>     | 602160      | TRANSCRIPTION FACTOR DP2                                        |
| <i>TGFB1</i>     | 190180      | TRANSFORMING GROWTH FACTOR, BETA-1                              |
| <i>TGFBR1</i>    | 190181      | TRANSFORMING GROWTH FACTOR-BETA RECEPTOR, TYPE I                |
| <i>TGFBR2</i>    | 190182      | TRANSFORMING GROWTH FACTOR-BETA RECEPTOR, TYPE II               |
| <i>TGIF1</i>     | 602630      | TRANSFORMING GROWTH FACTOR-BETA-INDUCED FACTOR                  |
| <i>TRIM33</i>    | 605769      | TRIPARTITE MOTIF-CONTAINING PROTEIN 33                          |
| <i>UCHL5</i>     | 610667      | UBIQUITIN CARBOXYL-TERMINAL HYDROLASE L5                        |
| <i>USP15</i>     | 604731      | UBIQUITIN-SPECIFIC PROTEASE 15                                  |
| <i>WWTR1</i>     | 607392      | WW DOMAIN-CONTAINING TRANSCRIPTION REGULATOR 1                  |
| <i>ZFYVE9</i>    | 603755      | MADH-INTERACTING PROTEIN                                        |

HGNC : HUGO Gene Nomenclature Committee ; OMIM : Online Mendelian Inheritance in Man.

**Table S4. Prediction of Identified *SKI* Variants**

| Family                                           | F1                | F2                | F3                             | F4                | F5                | F6                | F7                        | F8                | F9                  | F10               | F11               | F12               |
|--------------------------------------------------|-------------------|-------------------|--------------------------------|-------------------|-------------------|-------------------|---------------------------|-------------------|---------------------|-------------------|-------------------|-------------------|
| Affected individual                              | II-1              | II-1              | II-1, III-1, III-2, III-4, IV2 | II-2, II-3, II-4  | 11                | 12                | 13                        | 14                | 15                  | 16                | 17                | 18                |
| <b>Genomic location (bp), Hg19, Chromosome 1</b> | 2160305           | 2160299           | 2160485-2160497                | 2160306           | 2160309           | 2160299           | 2160488-2160497           | 2160308           | 2160300             | 2160305           | 2160299           | 2160297           |
| <b>Codon change</b>                              | GGC/TGC           | CTG/GTG           | TCCGACCGCTCC/-                 | GGC/GTC           | CCG/CAG           | CTG/GTG           | GACCGCTCC/-               | CCG/TCG           | CTG/CCG             | GGC/AGC           | CTG/GTG           | TCG/TTG           |
| <b>cDNA position</b>                             | c.100G>T          | c.94C>G           | c.280_291del<br>TCCGACCGCTCC   | c.101G>T          | c.104C>A          | c.94C>G           | c.283_291del<br>GACCGCTCC | c.103C>T          | c.95T>C             | c.100G>A          | c.94C>G           | c.92C>T           |
| <b>Protein position</b>                          | p.Gly34Cys        | p.Leu32Val        | p.Ser94_Ser97del               | p.Gly34Val        | p.Pro35Gln        | p.Leu32Val        | p.Asp95_Ser97del          | p.Pro35Ser        | p.Leu32Pro          | p.Gly34Ser        | p.Leu32Val        | p.Ser31Leu        |
| <b>Ensembl VEP</b>                               | Missense          | Missense          | 12-bp in-frame deletion        | Missense          | Missense          | Missense          | 9-bp in-frame deletion    | Missense          | Missense            | Missense          | Missense          | Missense          |
| <b>Polyphen2</b>                                 | Probably damaging | Possibly damaging | NA                             | Probably damaging | Probably damaging | Possibly damaging | NA                        | Probably damaging | Benign <sup>a</sup> | Probably damaging | Possibly damaging | Possibly damaging |
| <b>SIFT<sup>b</sup></b>                          | Damaging          | Damaging          | NA                             | Damaging          | Damaging          | Damaging          | NA                        | Damaging          | Damaging            | Damaging          | Damaging          | Damaging          |
| <b>EVS</b>                                       | -                 | -                 | -                              | -                 | -                 | -                 | -                         | -                 | -                   | -                 | -                 | -                 |
| <b>dbSNP</b>                                     | -                 | -                 | -                              | -                 | -                 | -                 | -                         | -                 | -                   | -                 | -                 | -                 |
| <b>In house exomes</b>                           | -                 | -                 | -                              | -                 | -                 | -                 | -                         | -                 | -                   | -                 | -                 | -                 |

NA : Not Available ; <sup>a</sup> Specificity : 0.44 ; Sensitivity : 0.98 ; <sup>b</sup> Median Information Content : 2.58. *SKI* genomic accession number: NC\_000001.10; *SKI* transcript accession number: NM\_003036.3.

**Table S5. Sequences of Primers Used to Sequence All Coding *SKI* Exons**

| <b>Amplicon</b> | <b>Forward Primer Sequence</b> | <b>Reverse Primer Sequence</b> | <b>PCR Conditions</b>                                                                           |
|-----------------|--------------------------------|--------------------------------|-------------------------------------------------------------------------------------------------|
| <b>E1-1</b>     | TCCAGCGGCGGGACCCCTT            | GATGGTCTCGCCTTCCAGTA           | PCR Touchdown 60-50°C 10+30 cycles<br>Standard Taq GC-Rich protocol (Roche)                     |
| <b>E1-ATG</b>   | ATGCCCATGACTTTGAGGAT           | GATGGTCTCGCCTTCCAGTA           | PCR Touchdown 65-55°C 10+30 cycles<br>Standard Taq Phusion GC-Rich protocol (Thermo)            |
| <b>E1-2</b>     | CAGGAGGCCTACAAGAAGGA           | GGCTGCTGTAGAGCTCGG             | PCR fixed Tm 56°C 40 cycles<br>Standard Taq GC-Rich protocol (Roche)                            |
| <b>E1-3</b>     | CTCATCACCAAGACGGACG            | TCGGAGACCAGAGCCTGTAG           | PCR Touchdown 60-50°C 10+30 cycles<br>Standard Taq Phusion GC-Rich protocol (Thermo)<br>DMSO 3% |
| <b>E2</b>       | AGTGCATGGGGCTCTGACT            | CAAGGAGAAGGGCCCAGTA            | PCR Touchdown 65-55°C 10+30 cycles<br>Taq Gold (Applied)                                        |
| <b>E3</b>       | GGGACATGAAGTGGCTTGTT           | ACCCAGCCTGCAGAAACAT            | PCR Touchdown 65-55°C 10+30 cycles<br>Taq Gold (Applied)                                        |
| <b>E4</b>       | GAGCACACCTAGAGCGTTCC           | AGGGAGGAGGCACAGAAAG            | PCR Touchdown 65-55°C 10+30 cycles<br>Taq Gold (Applied)                                        |
| <b>E5</b>       | CGTCTCCCTGGTGTGGAG             | GTTACCTGGTGCAGGCT              | PCR Touchdown 65-55°C 10+30 cycles<br>Taq Gold (Applied)                                        |
| <b>E6</b>       | ATGGTGAGGGGTGTGCTG             | CTGCTCCAAGGCCTTTCC             | PCR Touchdown 65-55°C 10+30 cycles<br>Taq Gold (Applied)                                        |
| <b>E7</b>       | TGTCCTAGCAGGTGGAGGAG           | TCTGAATTTCAAGTCTCCTTACTGG      | PCR Touchdown 60-50°C 10+30 cycles<br>Standard Taq GC-Rich protocol (Roche)                     |

E: Exon
